# Supplementary material for: Whole body resistance training on functional outcomes of patients with Stage 4 or 5 chronic kidney disease: A systematic review
Source: PubMed Central journal article supplement (PMC11319065; doi:10.14814/phy2.16151), 2024-08-12
Supplement: PHY2-12-e16151-s001.pdf [file PHY2-12-e16151-s001.pdf]

776 **Supplementary Figure 1: Completed PRISMA Chart**

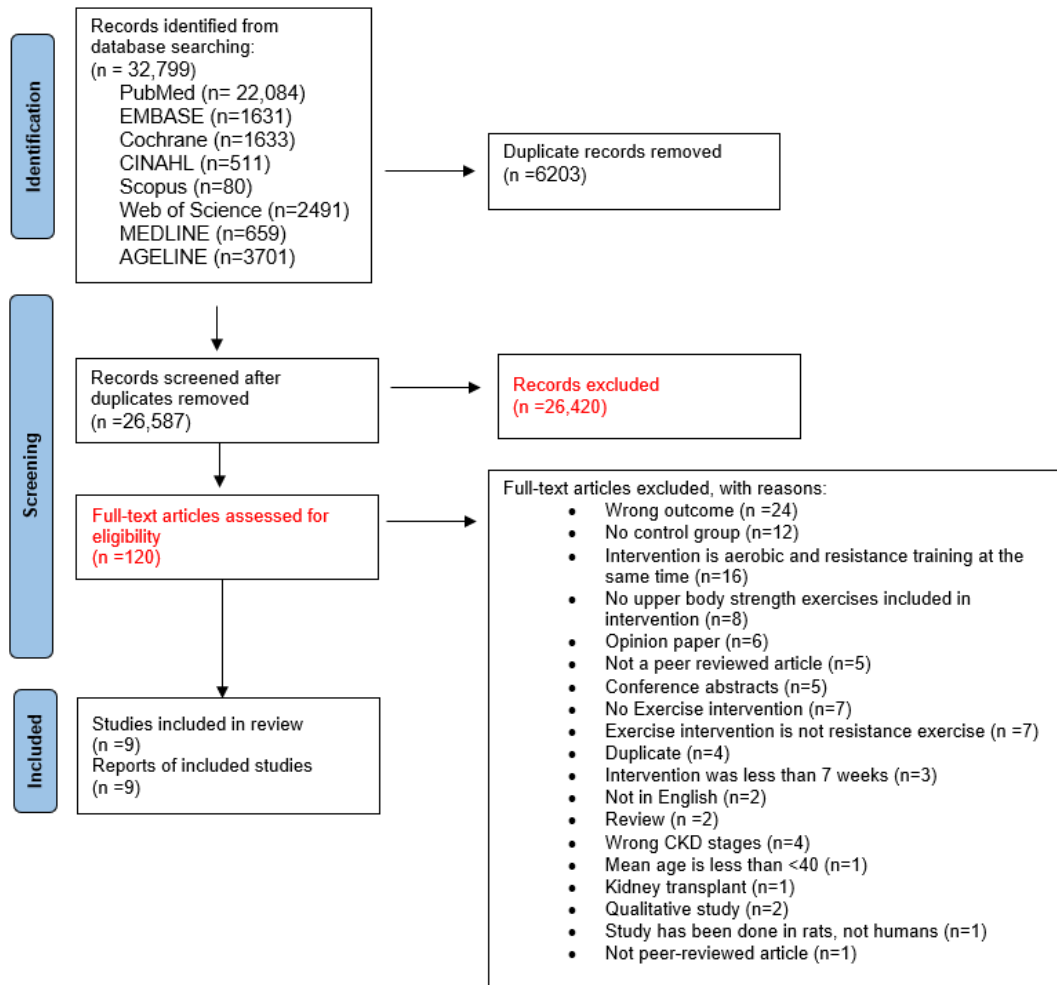

778 Note. Source: (Page et al., 2021).<sup>64</sup>
